# Supplementary material
Source: ML conference proceedings conference paper supplement (https://openaccess.thecvf.com/content/ICCV2025/html/Chae_What_to_Distill_ICCV_2025_paper.html)
Supplement: Supplementary file 1 [file Chae_What_to_Distill_ICCV_2025_supplemental.pdf]

# What to Distill? Fast Knowledge Distillation with Adaptive Sampling

## Supplementary Material

### A. Hyperparameter Selection

KDAS uses two hyperparameters (i.e., the initial and final sampling ratios) for quantity-based subsampling. Once they are determined for a certain KD method such as vanilla KD and LogitSTD, they can be reused for different model architectures and datasets, as reported in the paper.

KDAS uses four hyperparameters (i.e.,  $\lambda$ ,  $\gamma$ ,  $\theta_{low}$ ,  $\theta_{high}$ ) for quality-based calibration. We empirically tune these hyperparameters through a grid search on CIFAR-100. Table S1 presents an ablation study on the effects of the hyperparameters.

Table S1. Hyperparameter Exploration

| $\lambda$ | $\gamma$ | $\theta_{low}$ | $\theta_{high}$ | VGG13 $\rightarrow$ VGG8 | WRN40 $\rightarrow$ Res8 $\times$ 4 |
|-----------|----------|----------------|-----------------|--------------------------|-------------------------------------|
| 1000      | 0.5      | 20             | 80              | <b>73.91</b>             | <b>76.11</b>                        |
| 1500      | 0.5      | 20             | 80              | 73.42                    | 75.54                               |
| 2000      | 0.5      | 20             | 80              | 73.38                    | 75.41                               |
| 1000      | 0.1      | 20             | 80              | 73.55                    | 75.40                               |
| 1000      | 0.3      | 20             | 80              | 73.89                    | 75.63                               |
| 1000      | 0.7      | 20             | 80              | 73.85                    | 76.00                               |
| 1000      | 0.5      | 10             | 80              | 73.88                    | 76.04                               |
| 1000      | 0.5      | 30             | 80              | 73.71                    | 75.75                               |
| 1000      | 0.5      | 40             | 80              | 73.44                    | 75.55                               |

The hyperparameters for quality-based calibration used in our experiments ( $\lambda = 1000$ ,  $\gamma = 0.5$ ,  $\theta_{low} = 20$ ,  $\theta_{high} = 80$ ) are found to work robustly across KD methods and model architectures.

### B. Generalizability

#### B.1. Application to Vision Transformers

We apply KDAS to vision transformers in combination with a recent knowledge distillation method, LogitSTD. Table S2 shows the top-1 accuracy (%) of four vision transformer models on CIFAR-100 with ResNet56 as the teacher model.

Table S2. Application to Vision Transformers

| Method                 | DeiT-Ti        | T2T-ViT7       | PiT-Ti         | PVT-Ti         |
|------------------------|----------------|----------------|----------------|----------------|
| LogitSTD               | 78.55          | 78.43          | 78.76          | 78.43          |
| LogitSTD + KDAS        | 77.43          | 77.98          | <b>78.86</b>   | 77.63          |
| $\Delta$ Accuracy      | <b>-1.12%</b>  | <b>-0.45%</b>  | <b>+0.1%</b>   | <b>-0.8%</b>   |
| $\Delta$ Training Time | <b>-15.41%</b> | <b>-15.40%</b> | <b>-14.63%</b> | <b>-15.54%</b> |

KDAS improves both accuracy and training efficiency for PiT-Ti only, implying that other transformer models may require more data to benefit from LogitSTD.

#### B.2. Application to Object Detection

We further apply KDAS to the object detection task with the PASCAL VOC dataset. We target the backbone network of an object detection model, Faster R-CNN, for distillation. Table S3 summarizes the accuracy and training time reductions for each teacher and student pair.

Table S3. Application to Object Detection (Metric: mAP)

| T $\rightarrow$ S      | KD    | KD + KDAS             | DKD   | DKD + KDAS            |
|------------------------|-------|-----------------------|-------|-----------------------|
| R101 $\rightarrow$ R18 | 39.23 | <b>39.97 (-9.09%)</b> | 38.04 | <b>38.32 (-9.06%)</b> |
| R50 $\rightarrow$ MV2  | 36.14 | 36.13 <b>(-9.10%)</b> | 35.15 | <b>35.91 (-9.06%)</b> |

The results demonstrate a broader applicability of KDAS beyond the classification task.

### C. Comparison of Different Sampling Metrics

To justify the choice of KL divergence for sampling, we compare alternative metrics (i.e., Jensen–Shannon (JS) divergence and cross-entropy) for quantity-based subsampling in KDAS. Table S4 presents the classification accuracy across various architectures on CIFAR-100, under a fixed sampling ratio of 50%.

Table S4. Comparison of Different Sampling Metrics

| Teacher<br>Student   | WRN-16-2<br>ResNet8 $\times$ 4 | VGG13<br>VGG8 | ResNet110<br>ResNet20 |
|----------------------|--------------------------------|---------------|-----------------------|
| <b>KL Divergence</b> | <b>76.11</b>                   | <b>73.91</b>  | <b>70.72</b>          |
| JS Divergence        | 76.04                          | 73.86         | 70.57                 |
| Cross-Entropy        | 75.98                          | 73.40         | 70.15                 |

### D. Comparison with Data-Centric KD

We compare KDAS with recent data-centric distillation methods (KCD and UNIXKD) on CIFAR-100 for three architectures. Table S5 reports the accuracy and training time reductions obtained by each method.

Table S5. Comparison with Data-Centric KD Methods

| Teacher<br>Student | VGG13<br>VGG8          | ResNet56<br>ResNet20   | ResNet50<br>MobileNetV2s |
|--------------------|------------------------|------------------------|--------------------------|
| KDAS               | <b>73.91 (-30.22%)</b> | <b>71.66 (-27.1%)</b>  | <b>68.25 (-27.31%)</b>   |
| KCD [14]           | 73.44 <b>(-18.4%)</b>  | 70.75 <b>(-18.4%)</b>  | 67.94 <b>(-18.4%)</b>    |
| UNIXKD [5]         | 73.18 <b>(-23.65%)</b> | 70.06 <b>(-23.99%)</b> | 67.11 <b>(-24.69%)</b>   |

The results show that KDAS outperforms KCD and UNIXKD, achieving higher performance and greater reductions in training time, demonstrating the effectiveness of KDAS in data-centric KD scenarios.
